# Supplementary material for: N-ethylmaleimide-sensitive factor interacts with the serotonin transporter and modulates its trafficking: implications for pathophysiology in autism
Source: PubMed Central journal article supplement (PMC4022412; doi:10.1186/2040-2392-5-33), 2014-05-10
Supplement: 2040-2392-5-33-S1.pdf [file 2040-2392-5-33-S1.pdf]

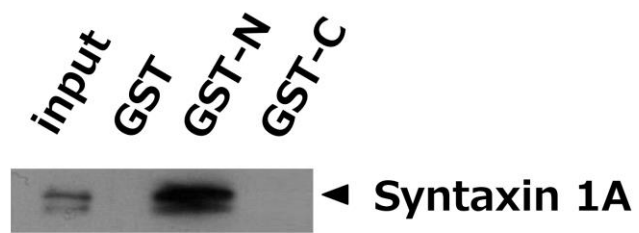

**Additional file 1.** N-tail-specific binding of Syntaxin 1A to SERT was confirmed by western blot analysis.
