# Supplementary material for: N-ethylmaleimide-sensitive factor interacts with the serotonin transporter and modulates its trafficking: implications for pathophysiology in autism
Source: PubMed Central journal article supplement (PMC4022412; doi:10.1186/2040-2392-5-33), 2014-05-10
Supplement: 2040-2392-5-33-S2.pdf [file 2040-2392-5-33-S2.pdf]

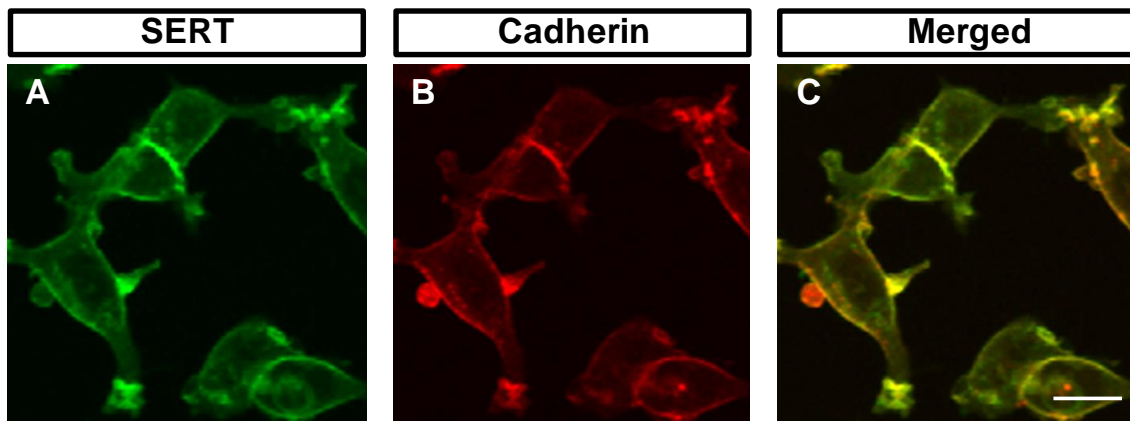

**Additional file 2.** SERT is transported to the plasma membrane in HEK293-hSERT cells. (A-C) Double immunocytochemical staining for SERT (green) and the membrane maker cadherin (red) in HEK293-hSERT cells. SERT mainly colocalized with the membrane maker (cadherin) (C: merged). Scale bar, 10  $\mu\text{m}$ . Results are representative of three independent experiments.
