# Supplementary material for: N-ethylmaleimide-sensitive factor interacts with the serotonin transporter and modulates its trafficking: implications for pathophysiology in autism
Source: PubMed Central journal article supplement (PMC4022412; doi:10.1186/2040-2392-5-33), 2014-05-10
Supplement: 2040-2392-5-33-S4.pdf [file 2040-2392-5-33-S4.pdf]

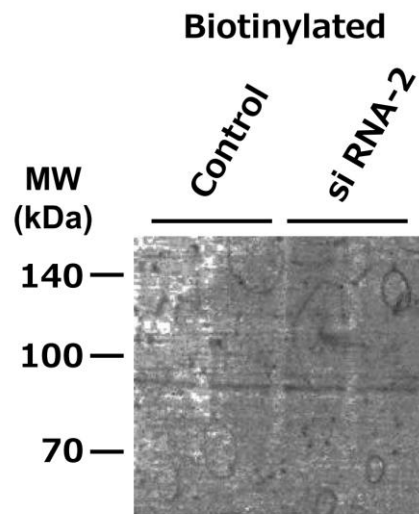

**Additional file 4.** CBB staining of membrane from biotinylated fractions. Biotinylation experiments in HEK293-hSERT cells transfected with siRNA-2 targeting a specific NSF sequence or negative control. Transfected cells were incubated with sulfo-NHS-SS-biotin. After western blot analysis, the membrane was stained with CBB as protein loading control.
