# Supplementary material for: N-ethylmaleimide-sensitive factor interacts with the serotonin transporter and modulates its trafficking: implications for pathophysiology in autism
Source: PubMed Central journal article supplement (PMC4022412; doi:10.1186/2040-2392-5-33), 2014-05-10
Supplement: 2040-2392-5-33-S5.pdf [file 2040-2392-5-33-S5.pdf]

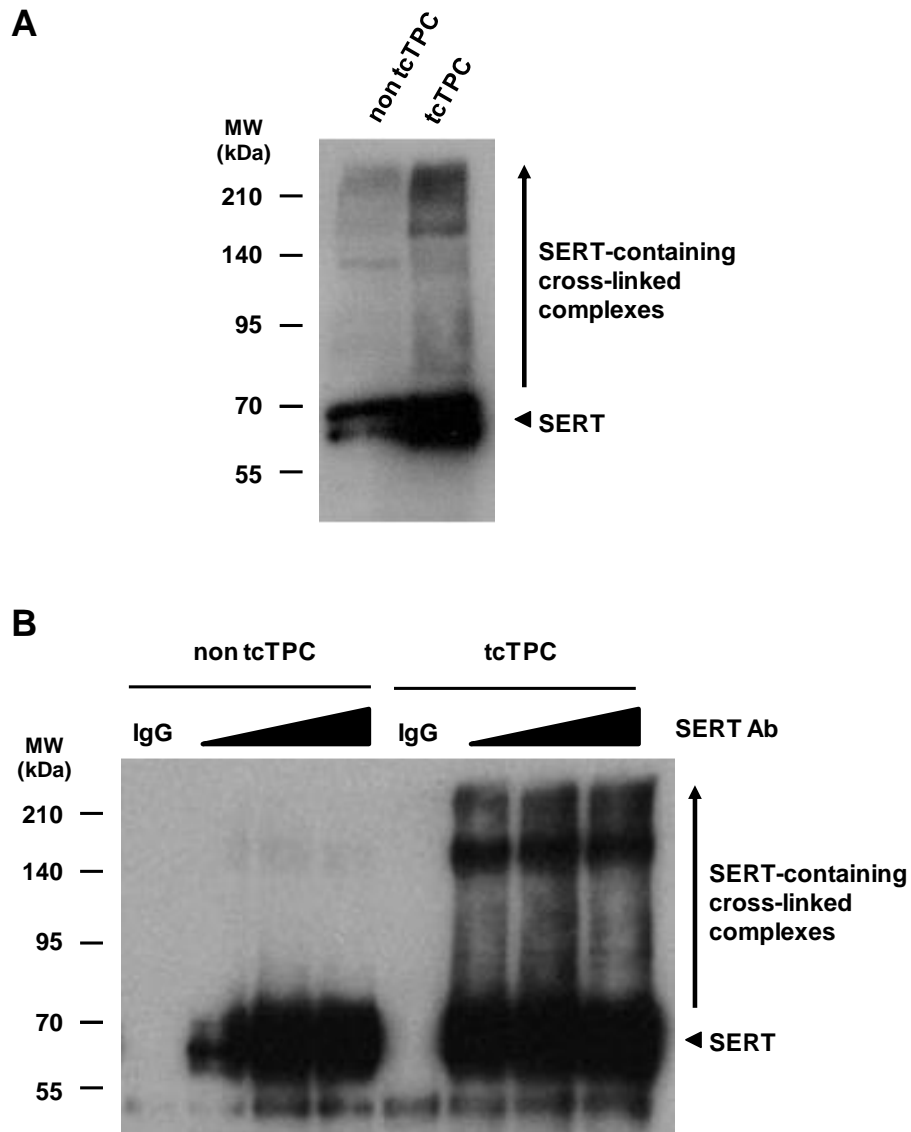

**Additional file 5.** Confirmation of tcTPC efficacy. (A) Western blotting of total proteins from non tcTPC- or tcTPC-treated mouse brains (*lane 1, 2, respectively*) using anti-SERT antibody. Results are representative of three independent experiments. It was confirmed that SERT-containing cross-linked complexes are retained by the tcTPC method (*lane 2*). (B) Proteins from non tcTPC- or tcTPC-treated mouse brains were immunoprecipitated with rat IgG as a negative control (*lanes 1 and 5, respectively*) and SERT antibody (*lanes 2–4 and 6–8, respectively*), and the resulting Western blot was

probed for SERT. In immunoprecipitated samples using tcTPC-treated mouse brains, SERT-containing cross-linked complexes were identified (*lane 6–8*) in a dose-dependent manner. Results are representative of three independent experiments.
